# Supplementary material for: Ciclopirox targets cellular bioenergetics and activates ER stress to induce apoptosis in non-small cell lung cancer cells
Source: PubMed Central journal article supplement (PMC8943949; doi:10.1186/s12964-022-00847-x), 2022-03-24
Supplement: 12964_2022_847_MOESM2_ESM.pdf [file 12964_2022_847_MOESM2_ESM.pdf]

**Supplementary information**

**Ciclopirox Targets Cellular Bioenergetics and Activates ER Stress to Induce  
Apoptosis in Non-small Cell Lung Cancer Cells**

Junwan Lu, Yujie Li, Shiwei Gong, Jiabin Wang, Xiaoang Lu, Qiumei Jin, Bin Lu, Qin Chen

## Figures

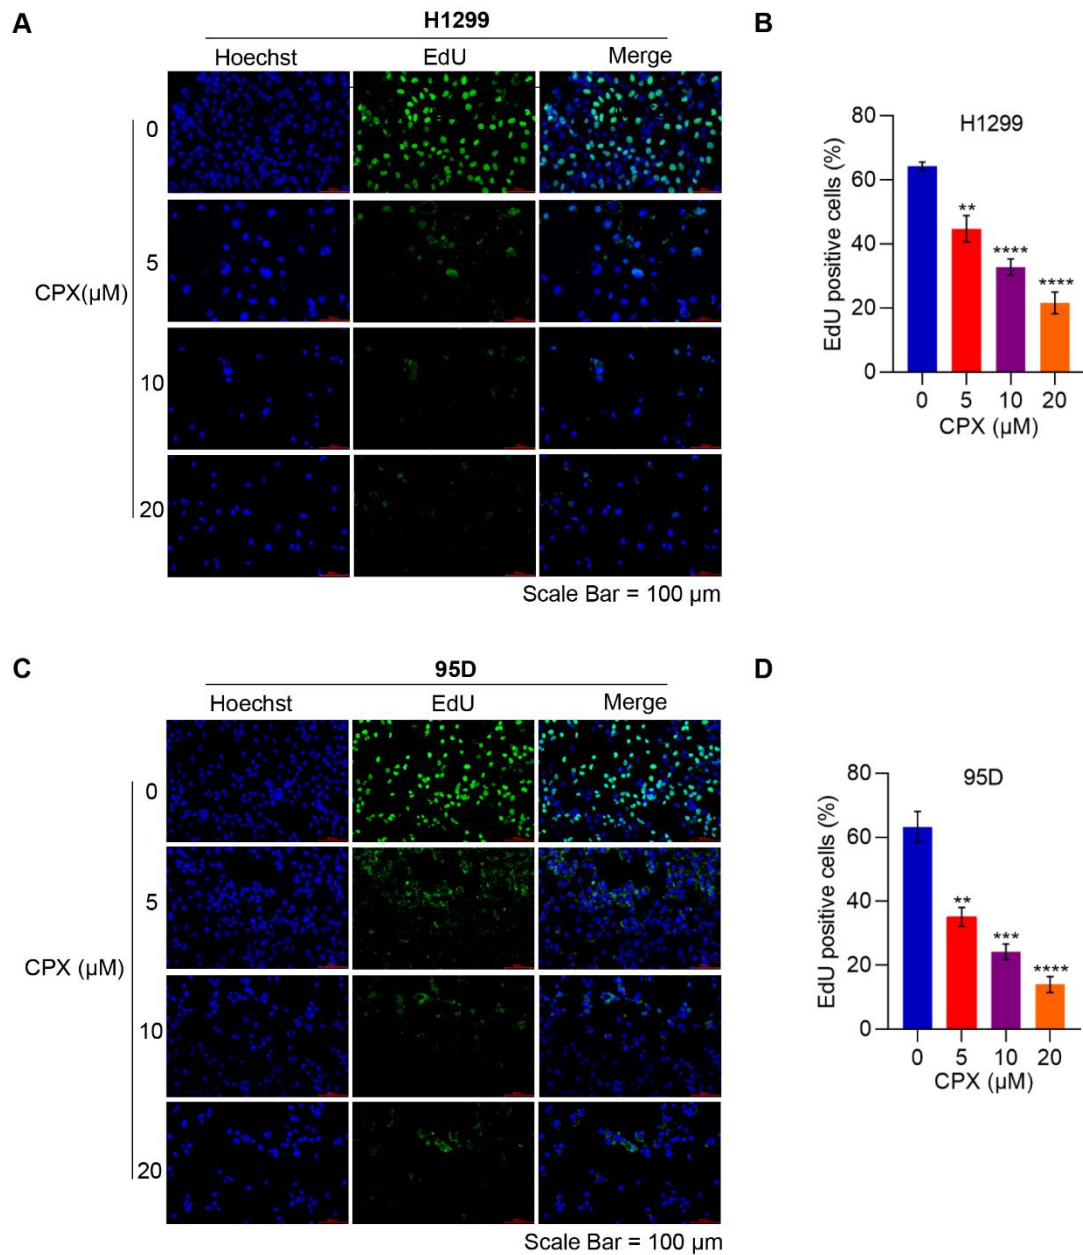

**Figure S1 CPX inhibited human NSCLC cell proliferation *in vitro*.** Fluorescence micrographs of CPX (0, 5, 10, and 20 μM, 24 h)-treated H1299 and 95D cells with EdU incorporation. Green, EdU-positive cells; Blue, Hoechst 33342 for nuclear staining. Scale bar, 100 μm. ( \*\*for  $p < 0.01$ , \*\*\*for  $p < 0.001$ , \*\*\*\*for  $p < 0.0001$ ).

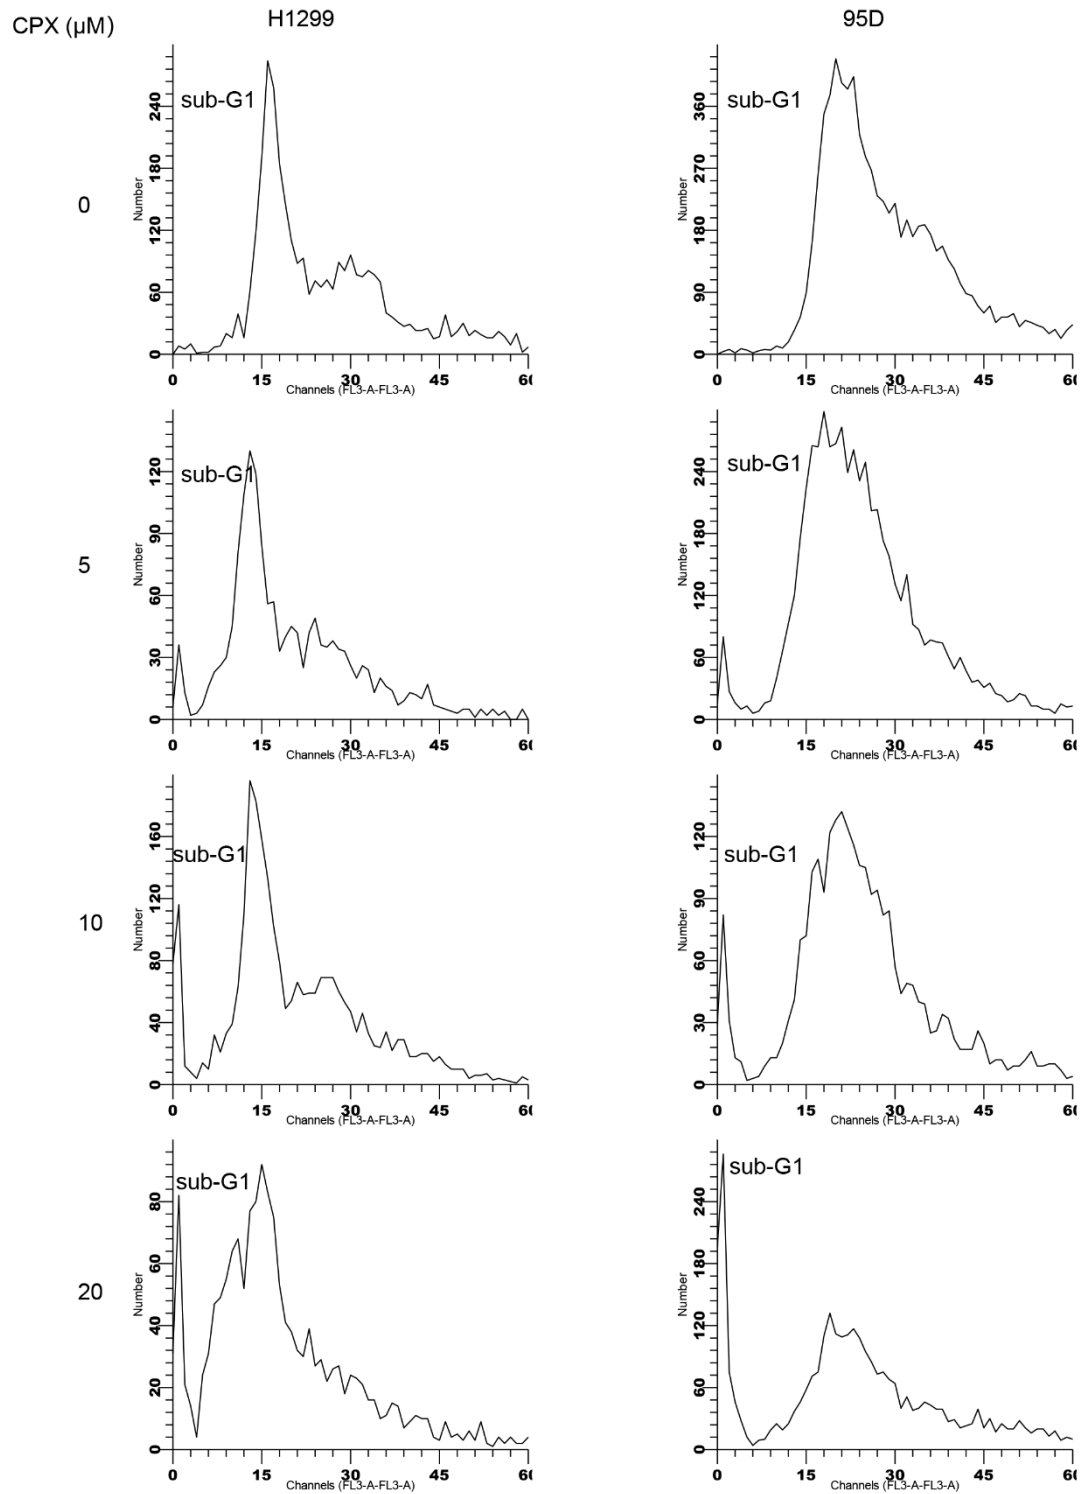

**Figure S2 Cell cycle distribution assay.** H1299 or 95D cells were incubated in the medium containing DMSO (vehicle control) or CPX (5, 10, 20  $\mu$ M) for 48 h. Cell cycle distribution was analyzed by flow cytometry. All cells were included in the analysis.

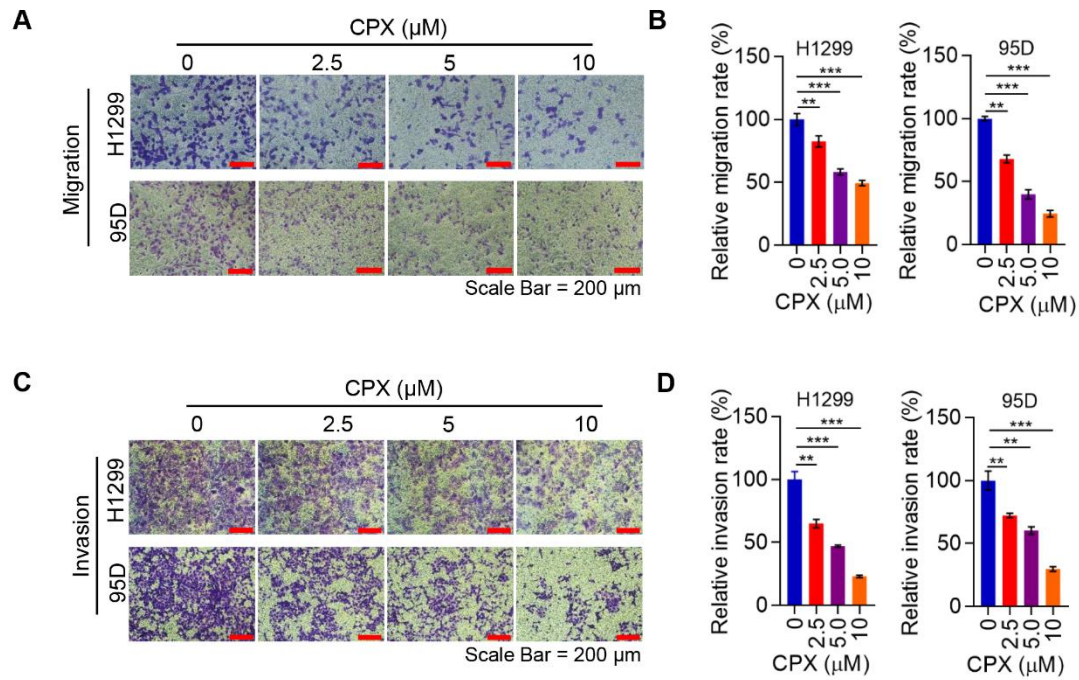

**Figure S3 CPX suppresses NSCLC cell migration and invasion.** A and B H1299 and 95D cells with the treatment of CPX (0, 2.5, 5, and 10  $\mu\text{M}$ ) for 48 h. The migrated H1299 and 95D cells were stained with crystal violet solution and detected using a light microscope. Representative images of transwell migration assay were shown (Scale bar: 200  $\mu\text{m}$ ) (A). Cell migration rate quantified with ImageJ Plus (B). C and D H1299 and 95D cells treated with CPX (0, 2.5, 5, and 10  $\mu\text{M}$ ) for 48 h. The invaded H1299 and 95D cells were stained with crystal violet solution and detected under a light microscope. Representative images of transwell invasion assay were shown (Scale bar: 200  $\mu\text{m}$ ) (C) and cell invasion rate quantified with ImageJ Plus (D). (\*\*for  $p < 0.01$ , \*\*\*for  $p < 0.001$ ).

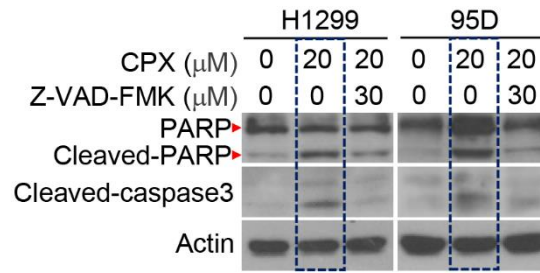

**Figure S4 CPX induced apoptosis in NSCLC through Caspase3-PARP pathway.** H1299 and 95D cells treated with CPX (0 and 20  $\mu$ M), CPX (20  $\mu$ M) combined with 30 mM Z-VAD-FMK for 48 h. Western blotting was used to detect the proteins as indicated.

## Tables

**Table S1 Sequences of primers used in qPCR analysis for selected genes.**

| <b>Genes</b>                    | <b>Forward 5'-3'</b>  | <b>Reverse 5'-3'</b> |
|---------------------------------|-----------------------|----------------------|
| <i>ND1</i>                      | TTCCTAATGCTTACCGAACGA | AGAAGAGCGATGGTGAGAGC |
| <i>COX I</i>                    | CAGAACGCAACCTCAACAC   | TCCGAATGGTAGGATAA    |
| <i><math>\beta</math>-ACTIN</i> | AGCACAGAGCCTCGCCTTG   | AAGCCGGCCTTGACATG    |

**Table S2 Sequences of primers used in qPCR for mtDNA copy number analysis.**

| <b>Genes</b>    | <b>Forward 5'-3'</b>                  | <b>Reverse 5'-3'</b>                  |
|-----------------|---------------------------------------|---------------------------------------|
| <i>CYT B</i>    | CCC CAC AAA CCC CAT TAC TAA<br>ACC CA | TTT CAT CAT GCG GAG ATG TTG<br>GAT GG |
| <i>18S rRNA</i> | TAG AGG GAC AAG TGG CGT TC            | CGC TGA GCC AGT CAG TGT               |

**Table S3 Details of the antibodies used for Western-blot and IHC analyses.**

| <b>Antibodies</b>        | <b>SOURCE</b>             | <b>Cat #</b> |
|--------------------------|---------------------------|--------------|
| Anti-ATF4                | Abcam                     | ab184909     |
| Anti-COXII               | Abcam                     | ab110258     |
| Anti-Ki67                | Abcam                     | ab181064     |
| Anti-PFKL                | Abcam                     | ab92742      |
| Anti-PKM2                | Abcam                     | ab154804     |
| Anti-Cyclin D1           | Cell signaling Technology | 55506        |
| Anti-Caspase 3           | Cell signaling Technology | 9662         |
| Anti-Cleaved-Caspase 3   | Cell signaling Technology | 9664         |
| Anti-Bip                 | Cell signaling Technology | 3177         |
| Anti-CHOP                | Cell signaling Technology | 5554         |
| Anti-p-Rb                | Cell signaling Technology | 8516         |
| Anti-N-Cadherin          | Cell signaling Technology | 13116        |
| Anti-PDI                 | Cell signaling Technology | 3501         |
| Anti-PERK                | Cell signaling Technology | 5683         |
| Anti-PERK-pT980          | Cell signaling Technology | 12185        |
| Anti-eIF2 $\alpha$       | Cell signaling Technology | 5324         |
| Anti-eIF2 $\alpha$ -pS51 | Cell signaling Technology | 3597         |
| Anti-PARP                | Cell signaling Technology | 9532         |
| Anti-Snail               | Cell signaling Technology | 3879         |
| Anti-p21                 | Cell signaling Technology | 2947         |
| Anti-LDHA                | Zen Bioscience            | 501146       |
| Anti-HK2                 | Zen Bioscience            | 220458       |
| Anti-PFKM                | Zen Bioscience            | 505477       |
| Anti-MMP2                | Santa Cruz Biotechnology  | 13595        |
| Anti-CDK4                | Bio-Rad                   | VMA00520     |
| Anti-Rb                  | ABclonal                  | A3618        |
| Anti-ATP5A               | Proteintech               | 14676-1-AP   |
| Anti-PGK1                | Proteintech               | 17811-1-AP   |
| Anti-MMP9                | Proteintech               | 10375-2-AP   |
| Anti-SDHA                | Proteintech               | 14865-1-AP   |
| Anti-UQCRC2              | Proteintech               | 14742-1-AP   |
| Anti- $\beta$ -actin     | Proteintech               | 60008-1-Ig   |
| Anti-E-Cadherin          | BD Biosciences            | 610182       |
